# Supplementary material for: Embedding tetrahedral 3d transition metal TM4 clusters into the cavity of two-dimensional graphdiyne to construct highly efficient and nonprecious electrocatalysts for hydrogen evolution reaction
Source: Royal Society of Chemistry journal article supplement (doi:10.1039/c9cp06057j), 2020-01-01
Supplement: c9cp06057j1.pdf [file c9cp06057j1.pdf]

# Electronic Supplementary Information

## **Embedding the Tetrahedral 3d Transition Metal TM<sub>4</sub> Clusters into the Cavity of Two-Dimensional Graphdiyne to Construct Highly Efficient and Nonprecious Electrocatalysts for Hydrogen Evolution Reaction**

Ruiqi Ku<sup>1</sup>, Guangtao Yu<sup>1,2\*</sup>, Jing Gao<sup>1</sup>, Xuri Huang<sup>1</sup> and Wei Chen<sup>1,2\*</sup>

<sup>1</sup> *Laboratory of Theoretical and Computational Chemistry, Institute of Theoretical Chemistry, Jilin University, Changchun 130023, People's Republic of China*

<sup>2</sup> *College of Chemistry and Materials Science, Fujian Normal University, Fuzhou, 350007, China*

\*To whom correspondence should be addressed. Email: [yugt@jlu.edu.cn](mailto:yugt@jlu.edu.cn) (G.Y.),  
[w\\_chen@jlu.edu.cn](mailto:w_chen@jlu.edu.cn) (W.C.)

**(I) The computational test on the effect of TM<sub>4</sub>-concentration on the calculated free energy of H\* ( $\Delta G_{H^*}$ )**

We have performed a computational test to explore the effect of TM<sub>4</sub>-concentration on the computed  $\Delta G_{H^*}$  value by sampling Co<sub>4</sub>@GDY system, where the supercell size of GDY is enlarged from the original 1×1 into 2×2, as illustrated Figure S1. Based on the enlarged structural models with the lower metal loading, we have computed the  $\Delta G_{H^*}$  values by considering all the possible adsorption sites. Table S1 collects the correlative computed results. It can be found that all the computed  $\Delta G_{H^*}$  values based on 2×2 supercell model with lower metal loading can be very close to the corresponding those from the original 1×1 supercell size, with a negligible change in the range of 0.005~0.077 eV, reflecting that the obtained  $\Delta G_{H^*}$  results based on 1×1 supercell size can be reasonable and reliable, and 1×1 supercell model can be used to simulate the realistic situation with the lower metal loading.

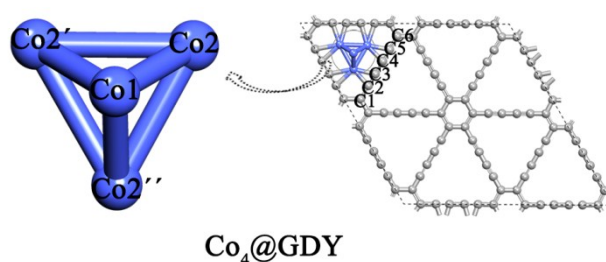

**Figure S1.** The top view of structural model for Co<sub>4</sub>@GDY system with 2×2 supercell size of GDY.

**Table S1.** The comparison between the computed  $\Delta G_{H^*}$  values on Co<sub>4</sub>@GDY by using 1×1 and 2×2 supercell size of GDY.

| Adsorption sites            | $\Delta G_{H^*}$ (eV) |        |
|-----------------------------|-----------------------|--------|
|                             | 1×1                   | 2×2    |
| T <sub>C1</sub>             | 1.081                 | 1.057  |
| T <sub>C2</sub>             | -0.286                | -0.281 |
| T <sub>C3</sub>             | 0.055                 | 0.011  |
| T <sub>C4</sub>             | -0.400                | -0.448 |
| T <sub>C5</sub>             | -0.360                | -0.283 |
| T <sub>C6</sub>             | 0.943                 | 0.994  |
| T <sub>Co1</sub>            | -0.016                | 0.014  |
| B <sub>Co1-Co2</sub>        | 0.027                 | 0.018  |
| H <sub>Co2-Co2'-Co2''</sub> | -0.112                | -0.096 |

**(II) Diffusion barrier of TM1 atom into the neighboring C ring for Fe<sub>4</sub>@GDY and Co<sub>4</sub>@GDY systems**

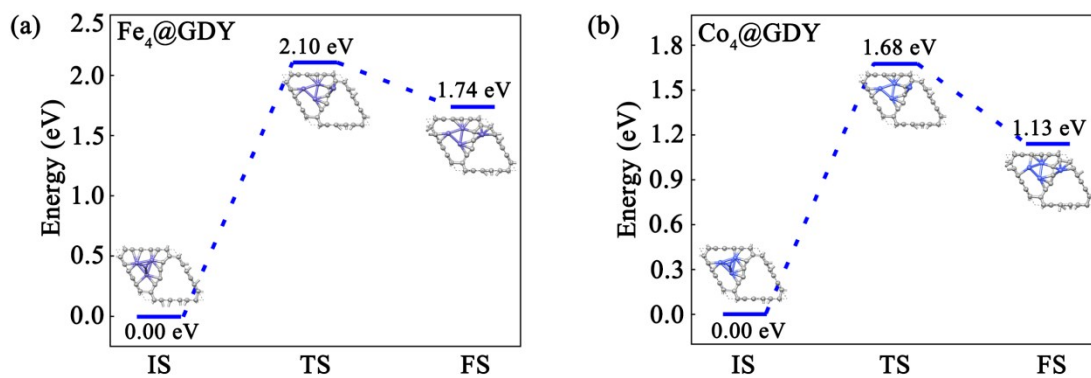

**Figure S2.** Atomic configurations for the diffusion of TM1 atom into the neighboring C ring for the representative TM<sub>4</sub>@GDY system for TM = Fe (a) and Co (b), respectively, including the initial state (IS), transition state (TS) and final state (FS). The energy is given with respect to IS.
